# Supplementary material
Source: PubMed Central journal article supplement (PMC6162114)
Supplement: NIHMS967226-supplement-supplement_1.pdf [file NIHMS967226-supplement-supplement_1.pdf]

**Supplemental Table I: Complement PCR primer sequences and product sizes**

| <b>Primer</b> | <b>Oligonucleotide Sequence<br/>(5' → 3')</b> | <b>Product Size<br/>(bp)</b> | <b>Gene bank code</b> |
|---------------|-----------------------------------------------|------------------------------|-----------------------|
| C1qb-1        | CAGGGATAAAAGGAGAGAAAGG                        | 357                          | X03084                |
| C1qb-2        | TGGCGTGGTAGGTGAAGTAGTA                        |                              |                       |
| C3-1          | GCTGCTCCTGCTACTAACCCA                         | 784                          | K02765                |
| C3-2          | AAAGGCAGTTCCTCCACTTT                          |                              |                       |
| C4-1          | TGCGGATCCAGCAGTTTCGG                          | 889                          | K02403                |
| C4-2          | TGGCGGTTGTTTCAGCTGCAG                         |                              |                       |
| FB-1          | GTG TGA CCA CCA CTC CAT GG                    | 685                          | L15702                |
| FB-2          | CCA TCC TCA GCA TCG ACT CC                    |                              |                       |
| FH-1          | ACATTACTTCATTCCCGTTGTC                        | 320                          | Y00716                |
| FH-2          | ATACTCCAGTTTCCCATCCCAA                        |                              |                       |
| C5-1          | AGTGTGTGGAAGGGTGAAG                           | 222                          | NM_001735             |
| C5-2          | GTTCTCTCGGGCTTCAACAG                          |                              |                       |
| C9-1          | CAACTGGGCCTCTCCATAA                           | 251                          | NM_001737             |
| C9-2          | CACAGGCAATTCCTCAAAT                           |                              |                       |
| 18S-1         | GACTCAACACGGGAAACCTC                          | 153                          | NM_011296.1           |
| 18S-2         | ATGCCAGAGTCTCGTTCGTT                          |                              |                       |

**Supplemental Table II: Proteins altered in nasal mucus of patients with CRSwNP compared to control subjects**

| Increased                                    | Decreased                                         |
|----------------------------------------------|---------------------------------------------------|
| Cystatin-SN                                  | Phosphoglycerate kinase 1                         |
| Alpha-2-macroglobulin                        | Macrophage-capping protein                        |
| Ig mu heavy chain disease protein            | Plastin-3                                         |
| Ig gamma-4 chain C region                    | Thioredoxin reductase 1, cytoplasmic              |
| Complement C4-A                              | Aldo-keto reductase family 1 member B10           |
| Ig kappa chain V-IV region (Fragment)        | NAD(P)H dehydrogenase [quinone] 1                 |
| Inter-alpha-trypsin inhibitor heavy chain H2 | 40S ribosomal protein S17-like                    |
| Ig kappa chain V-I region CAR                | Sulfotransferase 1A1                              |
| Ig heavy chain V-III region GAL              | Programmed cell death 6-interacting protein       |
| Haptoglobin                                  | Proteasome subunit beta type-10                   |
| Ig kappa chain V-I region AG                 | Cathepsin B                                       |
| Ig lambda chain V-IV region Hil              | Profilin-1                                        |
| Ig gamma-2 chain C region                    | Calmodulin                                        |
| Complement factor B                          | Tubulin alpha-1A chain                            |
| Haptoglobin-related protein                  | Peptidyl-prolyl cis-trans isomerase A-like 4A/B/C |
| IgGFc-binding protein                        | Tubulin beta-4A chain                             |
| Ig kappa chain V-I region DEE                | Glutathione S-transferase P                       |
| Ig mu chain C region                         | Cystatin-B                                        |
| Signal recognition particle 68 kDa protein   | Peptidyl-prolyl cis-trans isomerase A             |
| Ig kappa chain C region                      | Transketolase                                     |
| Beta-2-glycoprotein 1                        | 14-3-3 protein sigma                              |
| Ig heavy chain V-III region TRO              | Transgelin-2                                      |
| Serotransferrin                              | Fructose-bisphosphate aldolase C                  |
| Complement C3                                | Triosephosphate isomerase                         |
|                                              | Cofilin-1                                         |
|                                              | Argininosuccinate synthase                        |
|                                              | Alpha-actinin-4                                   |
|                                              | Rho GDP-dissociation inhibitor 1                  |
|                                              | 14-3-3 protein zeta/delta                         |
|                                              | Calcyphosin                                       |
|                                              | Pyruvate kinase isozymes M1/M2                    |
|                                              | Phosphatidylethanolamine-binding protein 1        |
|                                              | Tubulin alpha-1B chain                            |
|                                              | 14-3-3 protein epsilon                            |
|                                              | Cytosolic non-specific dipeptidase                |
|                                              | Heat shock 70 kDa protein 1A/1B                   |
|                                              | Elongation factor 1-alpha 1                       |
|                                              | Tubulin beta-2A chain                             |
|                                              | Protein SET                                       |
|                                              | Rab GDP dissociation inhibitor alpha              |
|                                              | Heat shock-related 70 kDa protein 2               |
|                                              | Heat shock 70 kDa protein 1-like                  |
|                                              | Calpain small subunit 1                           |
|                                              | Alcohol dehydrogenase [NADP(+)]                   |
|                                              | Keratin, type II cytoskeletal 8                   |

Heterogeneous nuclear ribonucleoprotein K  
Fructose-bisphosphate aldolase A  
Poly(rC)-binding protein 1  
Carbonyl reductase [NADPH] 1  
Superoxide dismutase [Cu-Zn]  
Eukaryotic translation initiation factor 5A-1  
Ribonuclease inhibitor  
Eukaryotic initiation factor 4A-I  
Transitional endoplasmic reticulum ATPase  
Elongation factor 2  
Chloride intracellular channel protein 1  
14-3-3 protein beta/alpha  
Retinal dehydrogenase 1  
Ras GTPase-activating-like protein IQGAP1  
Putative RNA-binding protein 3  
Myosin-10  
Peroxiredoxin-5, mitochondrial  
6-phosphogluconate dehydrogenase,  
decarboxylating  
Heat shock cognate 71 kDa protein  
Myosin light polypeptide 6  
14-3-3 protein theta  
Malate dehydrogenase, cytoplasmic  
Nucleophosmin  
Selenium-binding protein 1  
Phosphoglycerate mutase 1  
40S ribosomal protein SA  
Glucose-6-phosphate isomerase  
Adenylyl cyclase-associated protein 1  
S-formylglutathione hydrolase  
Ezrin  
Heat shock protein beta-1  
UTP--glucose-1-phosphate uridylyltransferase  
Aldo-keto reductase family 1 member C1  
Clathrin heavy chain 1  
PDZ and LIM domain protein 1  
Endoplasmin  
Nicotinamide phosphoribosyltransferase  
Alpha-enolase  
40S ribosomal protein S5  
Ubiquitin-like modifier-activating enzyme 1  
Heterogeneous nuclear ribonucleoprotein H  
Peroxiredoxin-6  
Protein S100-A4  
60S ribosomal protein L23  
Aldo-keto reductase family 1 member C3  
Stress-induced-phosphoprotein 1  
Vinculin

Myosin-11  
Peroxiredoxin-1  
X-ray repair cross-complementing protein 5  
Isocitrate dehydrogenase [NADP] cytoplasmic  
Alcohol dehydrogenase class 4 mu/sigma chain  
Putative nucleoside diphosphate kinase  
Leukocyte elastase inhibitor  
Aldehyde dehydrogenase, dimeric NADP-  
preferring  
Peroxiredoxin-2  
Calpain-2 catalytic subunit  
Proteasome subunit alpha type-2  
T-complex protein 1 subunit epsilon  
Acid ceramidase  
Obg-like ATPase 1  
Fatty acid-binding protein, epidermal  
Annexin A1  
Heterogeneous nuclear ribonucleoprotein M  
Protein DJ-1  
40S ribosomal protein S8  
14-3-3 protein gamma  
Rab GDP dissociation inhibitor beta  
Serine/threonine-protein phosphatase 2A 65 kDa  
regulatory subunit A alpha isoform  
Fructose-1,6-bisphosphatase 1  
Galectin-3  
Glutathione S-transferase A1  
Annexin A5  
Aspartate aminotransferase, cytoplasmic  
Aldo-keto reductase family 1 member C2  
SAM domain and HD domain-containing protein 1  
Cathepsin D



## **Supplemental Methods**

### **Nasal mucus procurement and proteomics screening**

Nasal mucus was collected as previously described.<sup>1-4</sup> The protein concentration of each mucus sample was determined using a BCA protein assay (Thermo Scientific). Equal amounts of protein from each sample (50 µg) were acetone precipitated (1:10) overnight at -20 °C. Precipitated proteins were brought up in 6 M urea, reduced with dithiothreitol and alkylated with iodoacetamide, followed by overnight digestion with trypsin (1:50) at 37 °C. Resulting peptides were desalted with a C-18 column, vacuum dried, then reconstituted in mobile phase (5% acetonitrile, 0.1% formic acid). A 15 µL aliquot of this peptide solution was separated across a 120 min linear gradient from 5% acetonitrile, 0.1% formic acid to 95% acetonitrile, 0.1% formic acid on a nano-LC system interfaced by electrospray ionization with an LTQ XL (Thermo Electron). Data-dependent analysis was used to perform MS/MS on the ten most intense ions between  $m/z = 400$  and 2000 in each MS spectra with a minimum signal of 500 cps. Dynamic exclusion was used with a repeat count of two and an exclusion duration of 120 s. Acquired data were converted to the mgf file format using msconvert (ProteoWizard v 3.0.4472) and default settings (including prefer vendor for peak picking), and searched using the Mascot search algorithm (v 2.4.1; Matrix Science). The database used was the 2012\_10 UniProt SwissProt release and varsplc isoform database, *Homo sapiens* taxonomy, as well as the common repository of adventitious proteins (v 2012.1.1; The Global Proteome Machine) with a combined total of 37,031 sequences. The following search parameters were specified: trypsin as the enzyme; carbamidomethyl fixed modification (C); variable modifications of acetyl (protein N-term), deamidated (NQ), pyro-Glu (N-term Q), and oxidation (M); precursor mass tolerance of 2 Da and fragment mass tolerance of 1 Da; 2 missed cleavages are allowed; instrument type is specified as ESI-TRAP. Data were searched against a target database as well as a decoy database which was the same database reversed. Post-processing was performed using ProteoIQ (v. 2.3.08) such that 2 peptides were required for positive identification, a 5% FDR

cutoff was used, and normalized spectral counts were exported for downstream analysis. The mass spectrometry proteomics data have been deposited to the ProteomeXchange Consortium via the PRIDE partner repository<sup>5</sup> with the dataset identifier PXD004144 and 10.6019/PXD004144.. Relative protein abundance was compared between the two groups using an exact Wilcoxon Rank Sum test (MATLAB v 8.3; MathWorks). Pathway enrichment analysis (REACTOME 2016) was accomplished using Enrichr and the top 10 pathways based on the combined Enrichr score are shown.<sup>6, 7</sup>

## **References**

1. Schlosser RJ, Mulligan JK, Hyer JM, Karnezis TT, Gudis DA, Soler ZM. Mucous Cytokine Levels in Chronic Rhinosinusitis-Associated Olfactory Loss. *JAMA otolaryngology-- head & neck surgery* 2016.
2. Sansoni ER, Sautter NB, Mace JC, Smith TL, Yawn JR, Lawrence LA *et al.* Vitamin D3 as a novel regulator of basic fibroblast growth factor in chronic rhinosinusitis with nasal polyposis. *International forum of allergy & rhinology* 2015; **5**(3): 191-196.
3. Banglawala SM, Mulligan JK, Psaltis AJ, Wang EW, Nguyen SA, Mulligan RM *et al.* Impact of intraoperative hydrodebrider treatment on postoperative sinonasal inflammation. *American journal of rhinology & allergy* 2014; **28**(5): 438-442.
4. Oyer SL, Mulligan JK, Psaltis AJ, Henriquez OA, Schlosser RJ. Cytokine correlation between sinus tissue and nasal secretions among chronic rhinosinusitis and controls. *The Laryngoscope* 2013; **123**(12): E72-78.
5. Vizcaino JA, Csordas A, del-Toro N, Dianas JA, Griss J, Lavidas I *et al.* 2016 update of the PRIDE database and its related tools. *Nucleic acids research* 2016; **44**(D1): D447-456.
6. Chen EY, Tan CM, Kou Y, Duan Q, Wang Z, Meirelles GV *et al.* Enrichr: interactive and collaborative HTML5 gene list enrichment analysis tool. *BMC bioinformatics* 2013; **14**: 128.
7. Kuleshov MV, Jones MR, Rouillard AD, Fernandez NF, Duan Q, Wang Z *et al.* Enrichr: a comprehensive gene set enrichment analysis web server 2016 update. *Nucleic acids research* 2016; **44**(W1): W90-97.
